# Supplementary material for: Electrochemical synthesis of CdTe/SWNT hybrid nanostructures and their tunable electrical and optoelectrical properties
Source: Royal Society of Chemistry journal article supplement (doi:10.1039/c2nr33029f), 2012-12-12
Supplement: c2nr33029f.pdf [file c2nr33029f.pdf]

## Supporting Information

### Electrochemical Synthesis of CdTe/SWNT Hybrid Nanostructures and Their Tunable Electrical and Optoelectrical Properties

Chong Hyun Chang<sup>a</sup>, Hyunsung Jung<sup>a</sup>, Youngwoo Rheem<sup>a</sup>, Kyu-Hwan Lee<sup>b</sup>, Dong-Chan Lim<sup>b</sup>, Yongsoo Jeong<sup>b</sup>, Jae-Hong Lim<sup>\*b</sup>, and Nosang V. Myung<sup>\*a</sup>

<sup>a</sup> Department of Chemical and Environmental Engineering,

University of California-Riverside, Riverside, CA 92521, USA.

<sup>b</sup> Electrochemistry Department, Korea Institute of Materials Science, Changwon 641-831, Korea.

<sup>§</sup> The first two authors contributed equally to this work.

\*Jae-Hong Lim; Tel: 82-55-280-3523, Fax: 82-55-280-3570, e-mail: [lim@kims.re.kr](mailto:lim@kims.re.kr) and Nosang V. Myung; Tel: 951-827-7710, Fax: 951-827-5696, e-mail: [myung@engr.ucr.edu](mailto:myung@engr.ucr.edu)

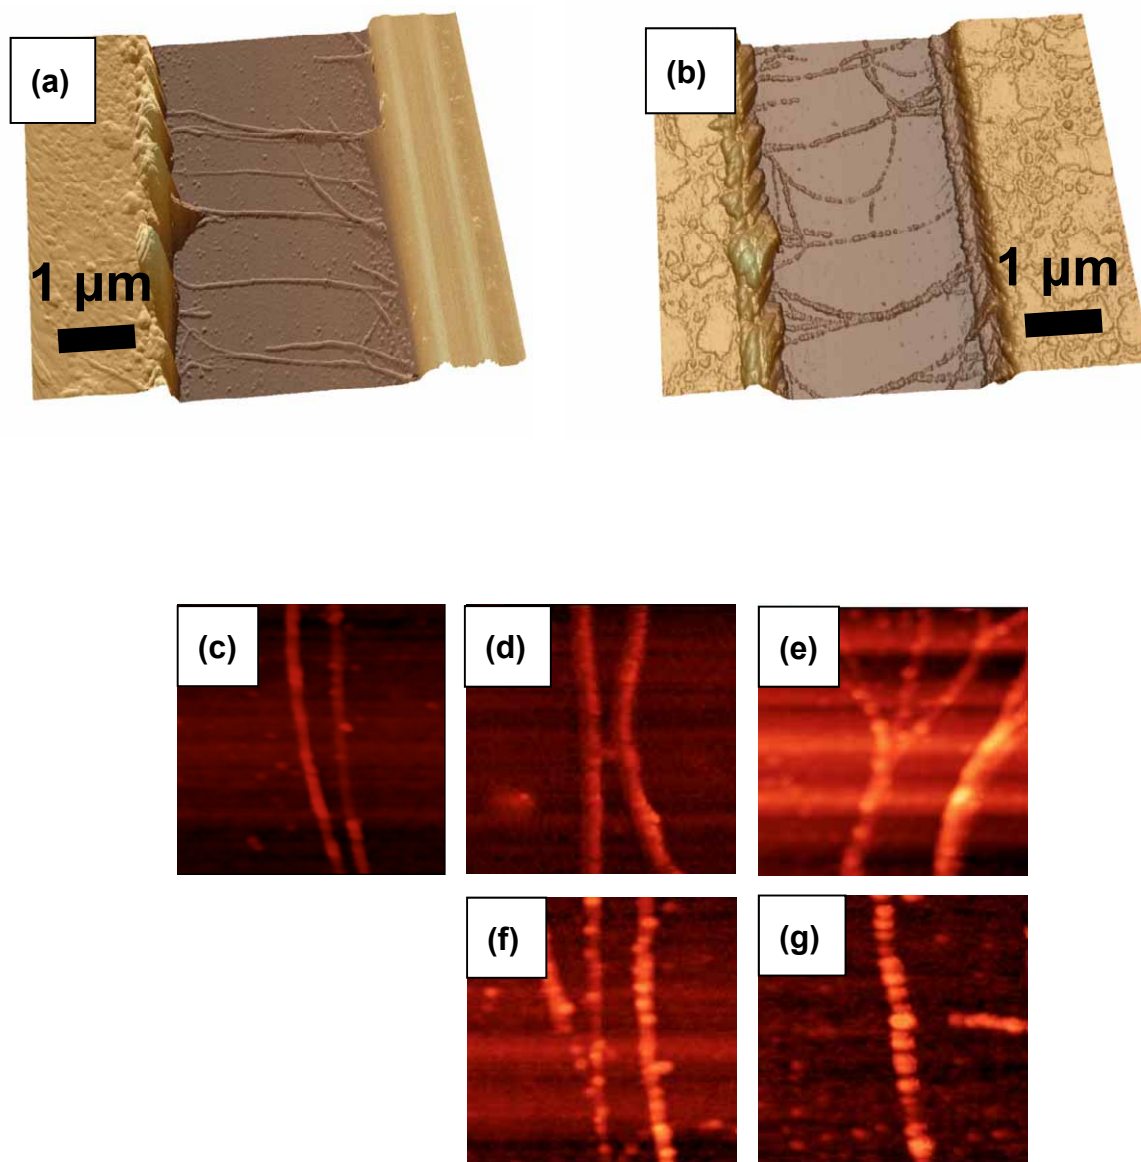

5 Fig. S1. AFM images of (a) undeeposited and (b) deposited SWNTs between gold electrodes with CdTe (30 mC/cm<sup>2</sup>). The topography of (c) bare and (d–g) CdTe/SWNT hybrid nanostructures. The CdTe was electrodeposited at fixed  $-0.50$  V vs. Ag/AgCl with varying charge densities: (d) 5, (e) 10, (f) 20, and (g) 30 mC/cm<sup>2</sup>.

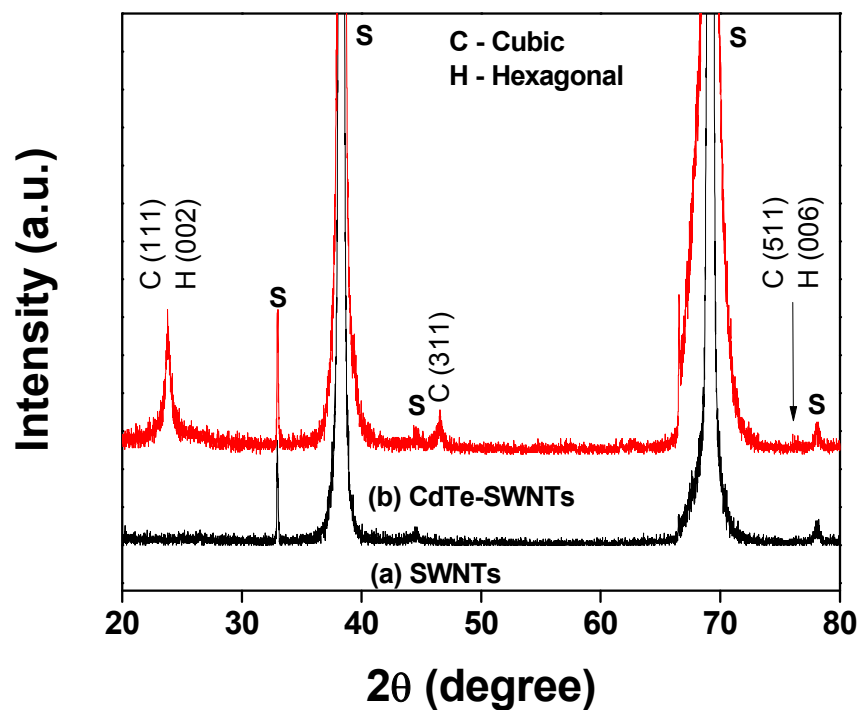

Fig. S2. XRD patterns of undeposited and CdTe-deposited SWNTs. The CdTe NPs were electrodeposited at  $-0.50$  V vs. Ag/AgCl with a charge density of  $2000$  mC/cm<sup>2</sup>. (S: SWNT/gold/Si substrate)

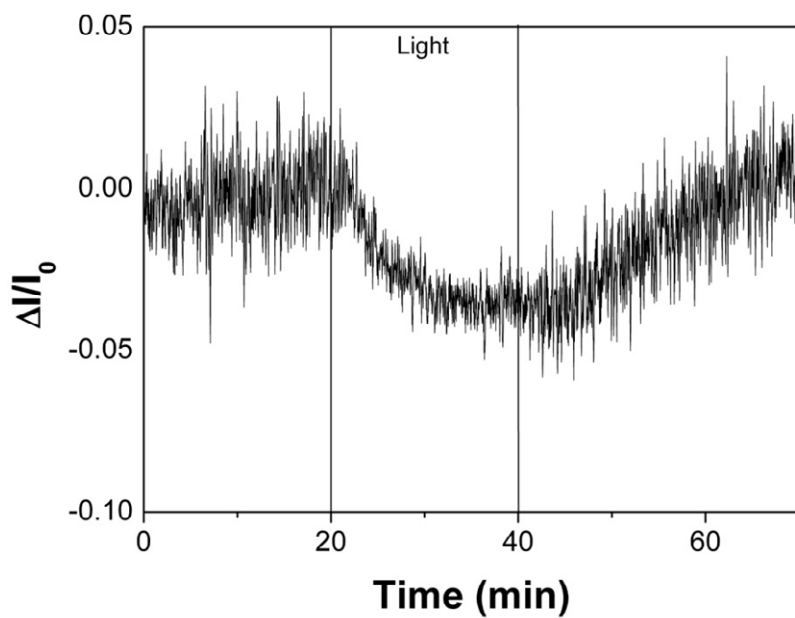

5

Fig. S3. Photoresponse of undeposited SWNTs between Cr/Au electrodes and at a bias of 1 V under UV illumination.
